# Supplementary material
Source: publisher figshare collection journal article supplement (https://sage.figshare.com/ndownloader/files/15523166)
Supplement: Supplementary file 1 [file 15523166]

## Appendix

### Questionnaire: Portuguese version of Emotional Thermometers – Burden Version

TERMÓMETROS EMOCIONAIS (Versão Sobrecarga)

Alex Mitchell ©

Versão portuguesa de N. Areia, S. Major, & A. P. Relvas, 2013

**Instruções:** Nas primeiras quatro colunas, por favor marque o número (0-10) que melhor descreve o seu grau de alteração emocional nas últimas duas semanas, incluindo o dia de hoje. Nas quatro colunas seguintes indique o quanto a situação tem impacto no seu trabalho, vida social, no seu lar e saúde em geral.

| ALTERAÇÃO EMOCIONAL                                                                                               |                                                                                          |                                                                                         |                                                                                    | IMPACTO                                                                             |                                                                                      |                                                                                      |                                                                                                                                                         |
|-------------------------------------------------------------------------------------------------------------------|------------------------------------------------------------------------------------------|-----------------------------------------------------------------------------------------|------------------------------------------------------------------------------------|-------------------------------------------------------------------------------------|--------------------------------------------------------------------------------------|--------------------------------------------------------------------------------------|---------------------------------------------------------------------------------------------------------------------------------------------------------|
| 1. Sofrimento Emocional                                                                                           | 2. Ansiedade                                                                             | 3. Depressão                                                                            | 4. Revolta                                                                         | 5. Trabalho                                                                         | 6. Social                                                                            | 7. Lar                                                                               | 8. Saúde em Geral                                                                                                                                       |
| Quão severo é o seu sofrimento emocional? Sofrimento emocional significa sentir-se triste, magoado ou preocupado. | Quão severa é a sua ansiedade? Ansiedade significa sentir-se inquieto, tenso ou agitado. | Quão severa é a sua depressão? Depressão significa sentir-se em baixo, fraco, retraído. | Quão severa é a sua revolta? Revolta significa sentir-se aborrecido, irritado.     | Quanto é que estes sintomas prejudicam o seu trabalho, estudos ou escola?           | Quanto é que estes sintomas prejudicam as suas atividades sociais ou de lazer?       | Quanto é que estes sintomas prejudicam a vida familiar ou responsabilidades do lar?  | Por favor, indique quão boa ou má está a sua saúde no dia de hoje. 10 indica o melhor estado de saúde que consegue imaginar e 0 o pior estado de saúde. |
| 10 = EXTREMO                                                                                                      | 10 = EXTREMO                                                                             | 10 = EXTREMO                                                                            | 10 = EXTREMO                                                                       | 10 = EXTREMAMENTE                                                                   | 10 = EXTREMAMENTE                                                                    | 10 = EXTREMAMENTE                                                                    | 10 = MELHOR ESTADO DE SAÚDE                                                                                                                             |
|                                 |        |       |  |  |  |  |                                                                     |
| 0 = NENHUM                                                                                                        | 0 = NENHUM                                                                               | 0 = NENHUM                                                                              | 0 = NENHUM                                                                         | 0 = SEM IMPACTO                                                                     | 0 = SEM IMPACTO                                                                      | 0 = SEM IMPACTO                                                                      | 0 = PIOR ESTADO DE SAÚDE                                                                                                                                |

Figure 1. ROC analysis of performance of ‘Emotional upset’ thermometers against GSI

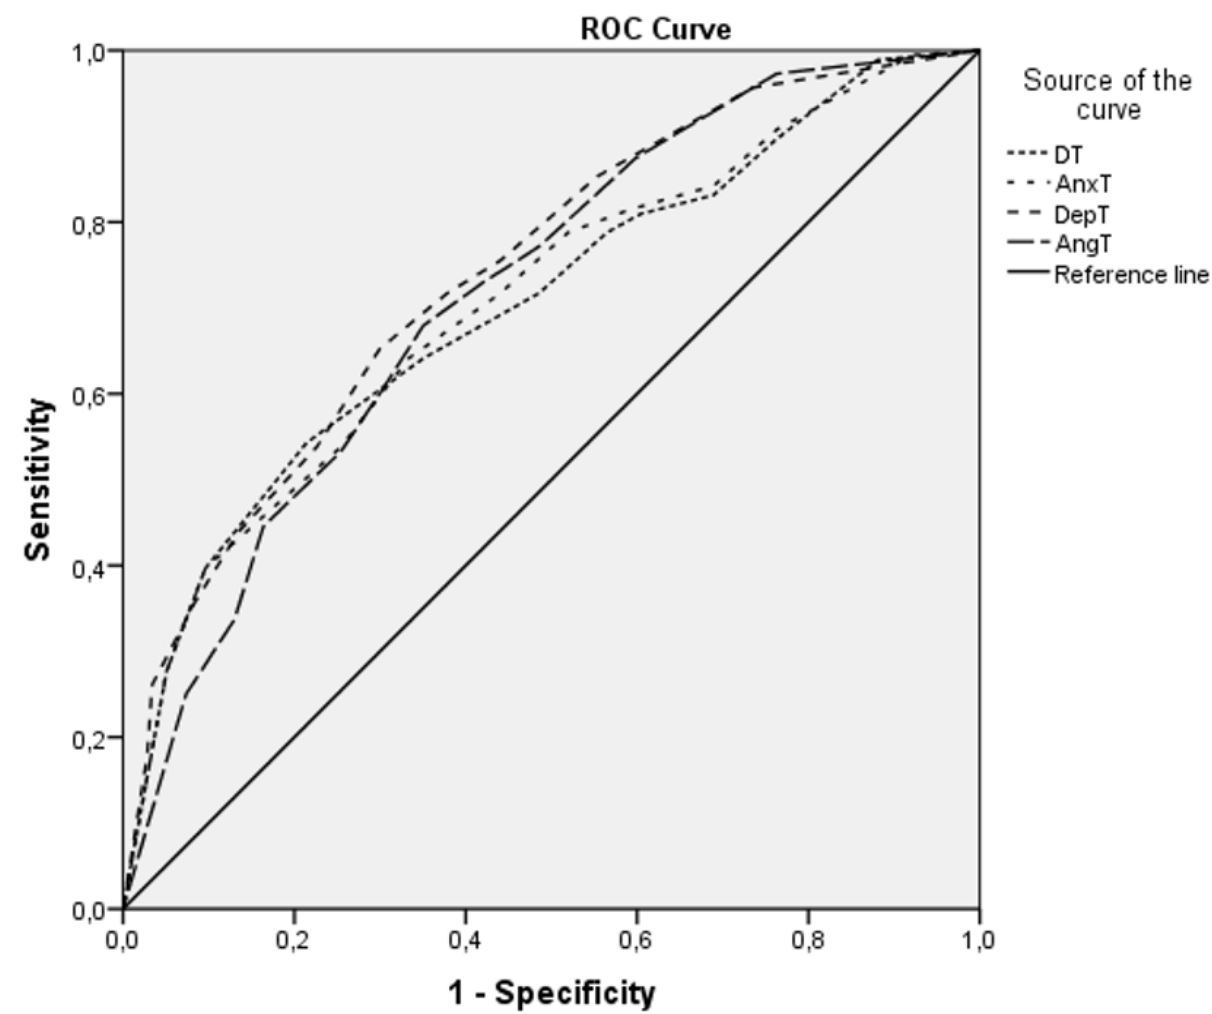

**Table 1**

ROC curve analysis and diagnostic, predictive and utility values, for 'Emotional upset' thermometers versus GSI for an optimal cut-off of  $\geq 5$

|             | <b>Diagnostic</b> |              |              |      | <b>Predictive</b> |              | <b>Utility</b> |              |
|-------------|-------------------|--------------|--------------|------|-------------------|--------------|----------------|--------------|
|             | AUC               | Se           | Sp           | AC   | PPV               | NPV          | CUI+           | CUI-         |
|             | [CI 95%]          | [CI 95%]     | [CI 95%]     |      | [CI 95%]          | [CI 95%]     | [CI 95%]       | [CI 95%]     |
| <b>DT</b>   |                   |              |              |      |                   |              |                |              |
| Distress    | 0.71              | 0.79         | 0.44         | 0.61 | 0.59              | 0.66         | 0.47           | 0.29         |
|             | [0.65; 0.76]      | [0.73; 0.85] | [0.36; 0.51] |      | [0.53; 0.65]      | [0.58; 0.75] | [0.39; 0.54]   | [0.22; 0.36] |
| <b>AnxT</b> |                   |              |              |      |                   |              |                |              |
| Distress    | 0.71              | 0.79         | 0.48         | 0.64 | 0.61              | 0.69         | 0.48           | 0.33         |
|             | [0.65; 0.76]      | [0.73; 0.85] | [0.41; 0.55] |      | [0.55; 0.67]      | [0.60; 0.77] | [0.41; 0.56]   | [0.26; 0.40] |
| <b>DepT</b> |                   |              |              |      |                   |              |                |              |
| Distress    | 0.74              | 0.65         | 0.70         | 0.68 | 0.69              | 0.66         | 0.45           | 0.46         |
|             | [0.69; 0.79]      | [0.58; 0.72] | [0.63; 0.77] |      | [0.63; 0.76]      | [0.59; 0.73] | [0.37; 0.54]   | [0.40; 0.52] |
| <b>AngT</b> |                   |              |              |      |                   |              |                |              |
| Distress    | 0.72              | 0.68         | 0.65         | 0.66 | 0.69              | 0.66         | 0.47           | 0.43         |
|             | [0.66; 0.77]      | [0.61; 0.75] | [0.58; 0.72] |      | [0.40; 0.58]      | [0.42; 0.54] | [0.06; 0.25]   | [0.26; 0.37] |

AUC = Area under the ROC curve, Se = Sensitivity, Sp = Specificity, AC = Diagnostic accuracy, PPV = Positive predictive value, NPV =

Negative predictive value, CUI+ = Positive clinical utility index, CUI- = Negative clinical utility index

Figure 2. ROC analysis of performance of ‘Impact’ thermometers against GSI

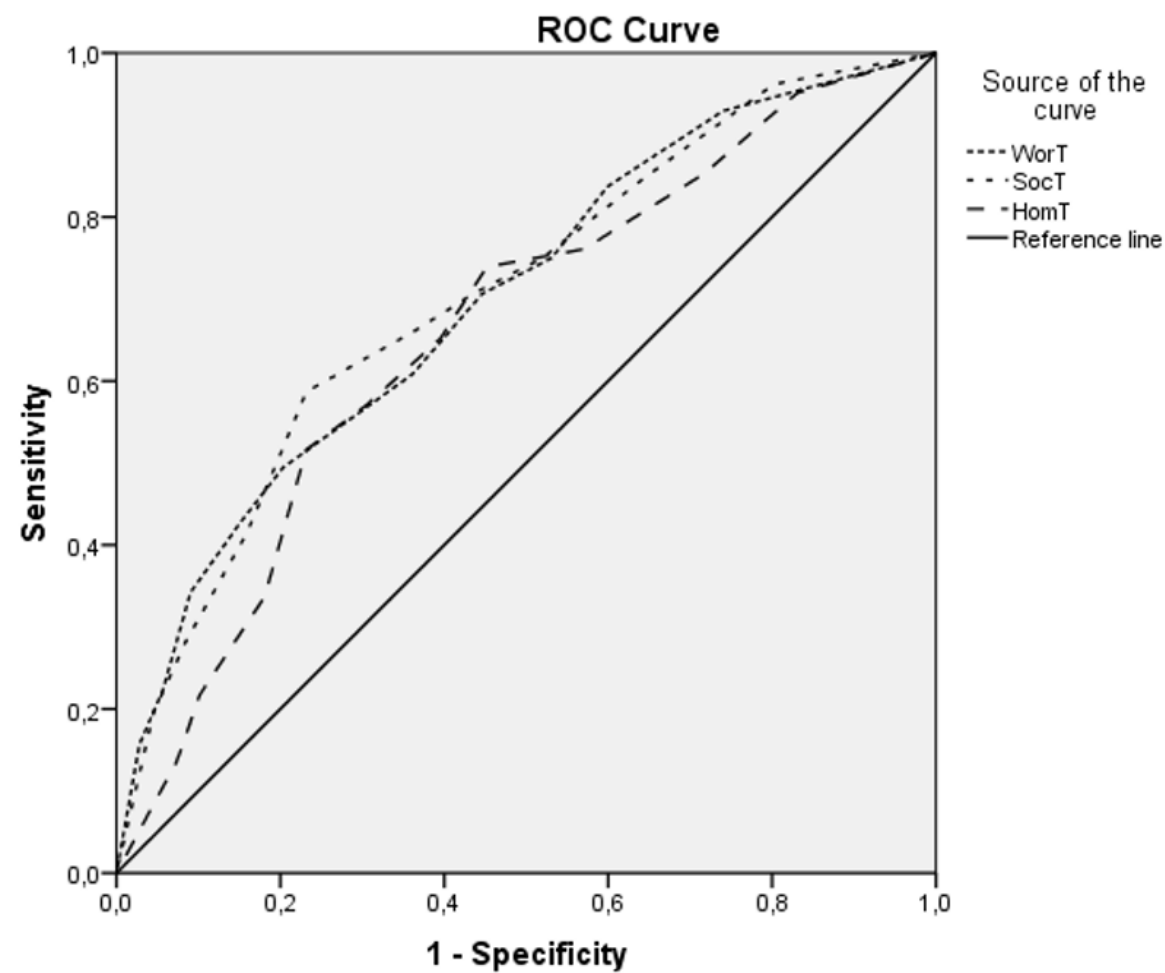

**Table 2**

ROC curve analysis and diagnostic, predictive and utility values, for 'Impact' thermometers versus GSI, for an optimal cut-off of  $\geq 4$

|             | Diagnostic                     |              |              |      | Predictive   |              | Utility      |              |
|-------------|--------------------------------|--------------|--------------|------|--------------|--------------|--------------|--------------|
|             | AUC                            | Se           | Sp           | AC   | PPV          | NPV          | CUI+         | CUI-         |
|             | [CI 95%]                       | [CI 95%]     | [CI 95%]     |      | [CI 95%]     | [CI 95%]     | [CI 95%]     | [CI 95%]     |
| <b>WorT</b> |                                |              |              |      |              |              |              |              |
| Distress    | 0.70                           | 0.71         | 0.55         | 0.63 | 0.62         | 0.64         | 0.44         | 0.35         |
|             | [0.65; 0.76]                   | [0.64; 0.77] | [0.48; 0.63] |      | [0.56; 0.69] | [0.57; 0.72] | [0.36; 0.52] | [0.29; 0.42] |
| <b>SocT</b> |                                |              |              |      |              |              |              |              |
| Distress    | 0.71                           | 0.71         | 0.57         | 0.64 | 0.63         | 0.65         | 0.45         | 0.37         |
|             | [0.65; 0.76]                   | [0.64; 0.77] | [0.49; 0.64] |      | [0.56; 0.69] | [0.57; 0.73] | [0.36; 0.53] | [0.30; 0.43] |
| <b>HomT</b> |                                |              |              |      |              |              |              |              |
| Distress    | 0.66                           | 0.74         | 0.55         | 0.64 | 0.63         | 0.67         | 0.47         | 0.37         |
|             | [0.61; 0.72]                   | [0.68; 0.80] | [0.48; 0.62] |      | [0.57; 0.69] | [0.59; 0.75] | [0.39; 0.54] | [0.30; 0.43] |
| <b>HeaT</b> |                                |              |              |      |              |              |              |              |
| Distress    | 0.56 [0.50; 0.62] <sup>a</sup> |              |              |      |              |              |              |              |

AUC = Area under the ROC curve, Se = Sensitivity, Sp = Specificity, AC = Diagnostic accuracy, PPV = Positive predictive value, NPV = Negative predictive value, CUI+ = Positive clinical utility index, CUI- = Negative clinical utility index

<sup>a</sup> did not achieve an, at least, sufficient diagnostic accuracy (AUC < 0.60) and, thus, further analysis were not performed
